# Supplementary material
Source: publisher figshare collection journal article supplement (https://frontiersin.figshare.com/ndownloader/files/21519588)
Supplement: Supplementary file [file 21519588]

## Supplementary Figure 1. A Sample Process of Converting 3D MR Images to Video Format

**3D Nifti image**

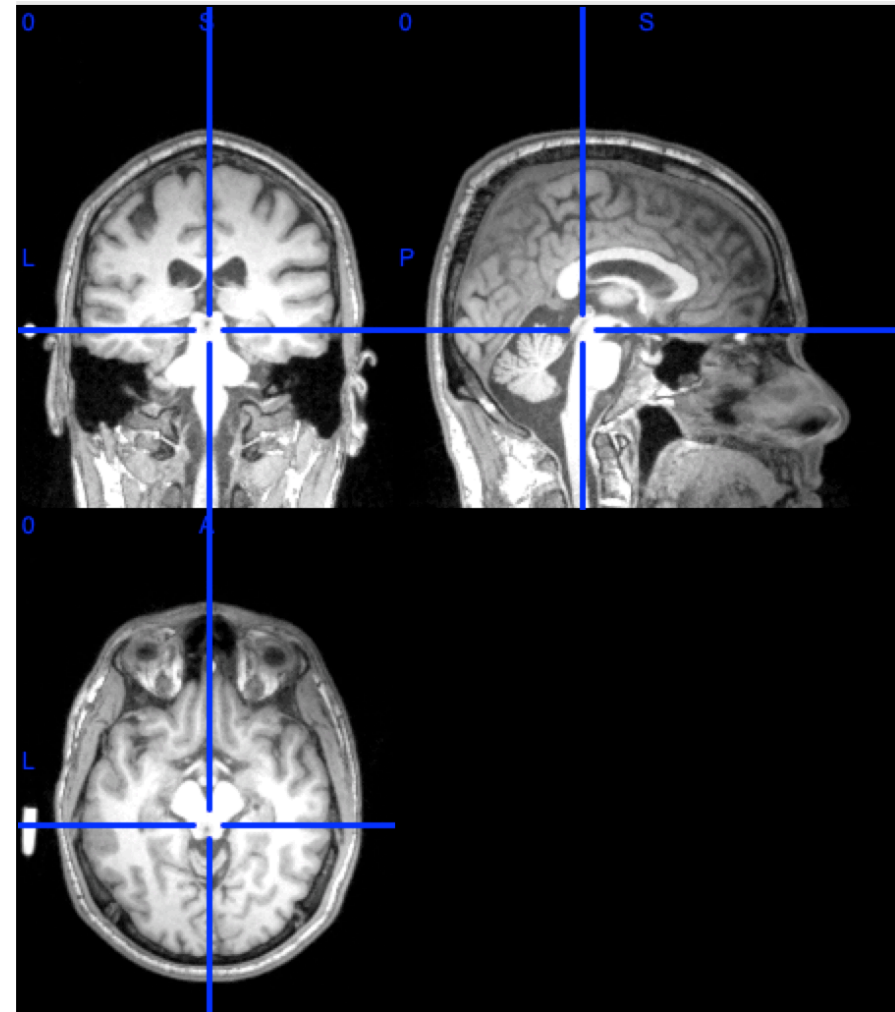

**Extract serial transverse images**

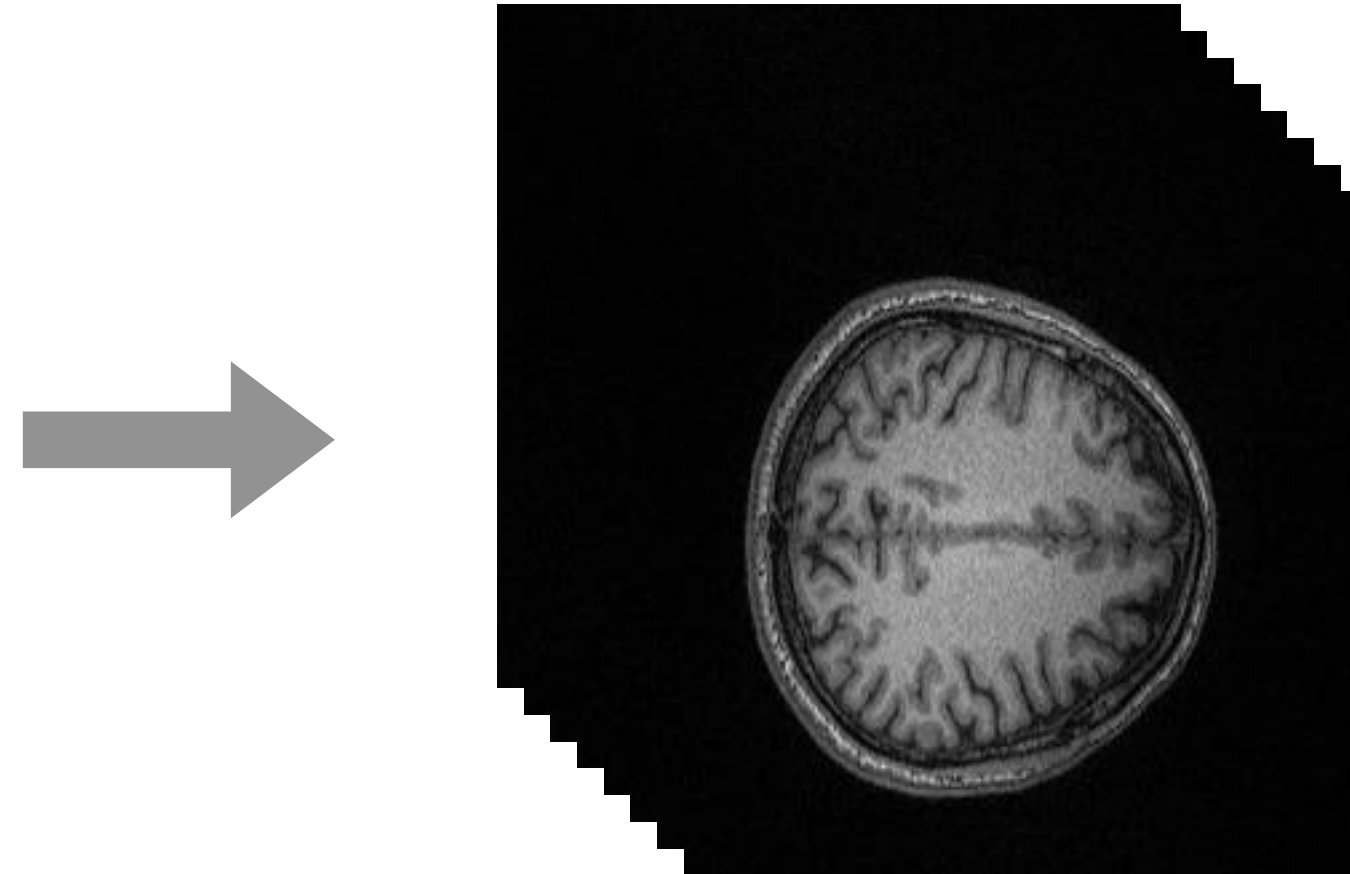

**Short videos**

180 frames  
10 frame/ sec

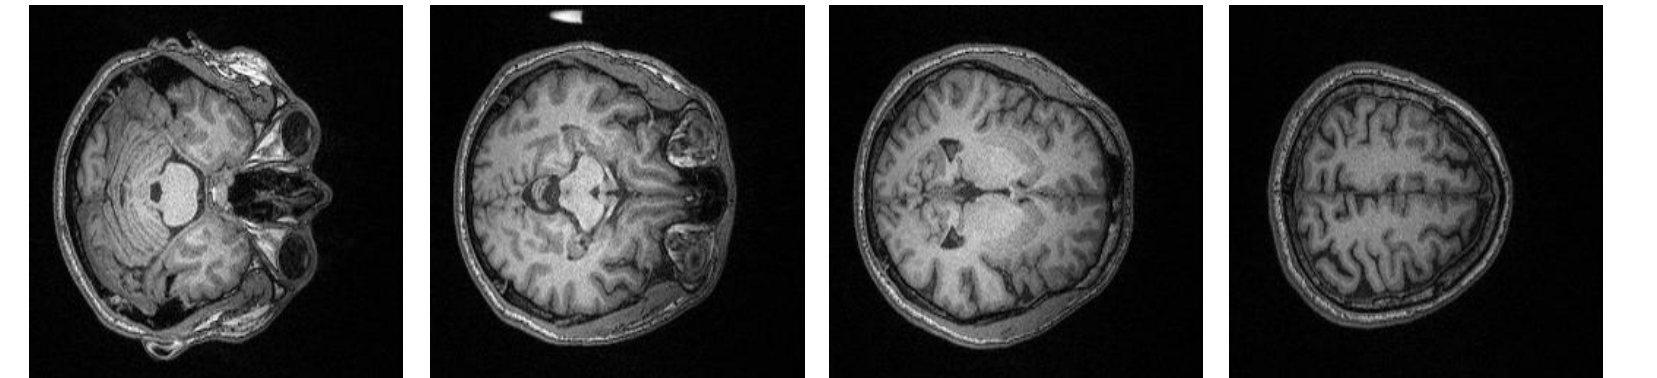

0 sec

18 sec
